# Supplementary material for: Latent Class Analysis: Insights about design and analysis of schistosomiasis diagnostic studies
Source: PubMed Central journal article supplement (PMC7888681; doi:10.1371/journal.pntd.0009042), 2021-02-04
Supplement: pntd.0009042.s001.pdf [file pntd.0009042.s001.pdf]

## S1 Appendix: Results (fit measures) for the Uganda data set

Table 1 gives the GF-Fit values for the pair POC-CCA and SEA-ELISA diagnostic tests and for the LC, LCRE and FM models for the Uganda data set.

Table 1: Contribution to GF-Fits: POC-CCA by SEA-ELISA, N=258

| POC-CCA      | SEA-ELISA | $N \times p_{ab}$ | $N \times \hat{p}_{ab}$<br>LC | $N \times \hat{p}_{ab}$<br>LCRE | $N \times \hat{p}_{ab}$<br>FM |
|--------------|-----------|-------------------|-------------------------------|---------------------------------|-------------------------------|
| 0            | 0         | 59                | 50.14                         | 50.21                           | 55.03                         |
| 0            | 1         | 52                | 61.30                         | 61.10                           | 56.69                         |
| 1            | 0         | 5                 | 14.91                         | 14.20                           | 10.68                         |
| 1            | 1         | 142               | 131.66                        | 132.49                          | 135.60                        |
| Total GF-Fit |           |                   | 10.37                         | 9.54                            | 4.00                          |

Table 2 gives the univariate and bivariate GF-Fits for the LC, LCRE and FM models for all pairs of diagnostic tests. The univariate fits are in the diagonal and the bivariate fits are below the diagonal. Among the three models the LCRE provides the smallest bivariate GF-Fits but all models show adequate fit. Each value that appears in the table is smaller than 16.

Table 2: Univariate and Bivariate GF-Fits, Uganda dataset

LC

|            | POC-CCA | DNA-TaqMan | SEA-ELISA | Kato-Katz1 | Kato-Katz2 |
|------------|---------|------------|-----------|------------|------------|
| POC-CCA    | 0.00    |            |           |            |            |
| DNA-TaqMan | 0.60    | 0.00       |           |            |            |
| SEA-ELISA  | 10.37   | 3.48       | 0.02      |            |            |
| Kato-Katz1 | 1.66    | 0.51       | 0.22      | 0.00       |            |
| Kato-Katz2 | 0.58    | 0.13       | 0.13      | 2.49       | 0.00       |

LCRE

|            | POC-CCA | DNA-TaqMan | SEA-ELISA | Kato-Katz1 | Kato-Katz2 |
|------------|---------|------------|-----------|------------|------------|
| POC-CCA    | 0.00    |            |           |            |            |
| DNA-TaqMan | 0.32    | 0.00       |           |            |            |
| SEA-ELISA  | 9.54    | 3.09       | 0.00      |            |            |
| Kato-Katz1 | 0.58    | 0.16       | 0.01      | 0.00       |            |
| Kato-Katz2 | 0.02    | 0.00       | 0.12      | 1.59       | 0.00       |

FM

|            | POC-CCA | DNA-TaqMan | SEA-ELISA | Kato-Katz1 | Kato-Katz2 |
|------------|---------|------------|-----------|------------|------------|
| POC-CCA    | 0.01    |            |           |            |            |
| DNA-TaqMan | 0.35    | 0.01       |           |            |            |
| SEA-ELISA  | 4.00    | 3.11       | 0.06      |            |            |
| Kato-Katz1 | 1.99    | 3.14       | 0.44      | 0.03       |            |
| Kato-Katz2 | 0.92    | 2.16       | 0.07      | 11.78      | 0.03       |
