# Supplementary material for: Latent Class Analysis: Insights about design and analysis of schistosomiasis diagnostic studies
Source: PubMed Central journal article supplement (PMC7888681; doi:10.1371/journal.pntd.0009042), 2021-02-04
Supplement: pntd.0009042.s004.pdf [file pntd.0009042.s004.pdf]

## S1 File: JAGS code

Note that in the following, class 1 indicates diseased class, and class 2 indicates the healthy class.

### Latent Class Model with Conditional Independence

```
model{
  for (i in 1:n) {
    d[i] ~ dbern(tau)
    for (j in 1:p) {
      pi.x[i, j] <- d[i] * pi[j,1] + (1 - d[i]) * pi[j,2]
      X[i, j] ~ dbern(pi.x[i, j])
    }
  }

  # Priors (uninformative)
  tau ~ dbeta(1,1)
  for (j in 1:(p-1)) {
    pi[j,1] ~ dbeta(1,1)
    pi[j,2] ~ dbeta(1,1)
  }

  # Gold standard item
  pi[p, 1] <- 1 # This fixes sens and spec to 1.If no gold standard
  pi[p, 2] <- 1 # then assign dbeta(1,1) priors.

  # Sensitivities and specificities
  for (j in 1:p) {
    sens[j] <- pi[j,1]
    spec[j] <- 1 - pi[j,2]
  }
}

#data# X, n, p
#monitor# tau, sens, spec, deviance
```

### Latent class Gaussian random effects model

```
model{
  for (i in 1:n) {
    d[i] ~ dbern(tau)
    for (j in 1:p) {
      u1[i,j] ~ dnorm(beta[j,1], psi[1])
      u0[i,j] ~ dnorm(beta[j,2], psi[2])
      pi.x[i,j] <- d[i] * phi(u1[i,j]) + (1 - d[i]) * phi(u0[i,j])
      X[i,j] ~ dbern(pi.x[i,j])
    }
  }
}
```

```

# Priors
tau ~ dbeta(1,1)
for (k in 1:2) {
  psi[k] ~ dgamma(0.1, 0.1)
  sigma[k] <- 1 / sqrt(psi[k])
}
for (j in 1:(p-1)) {
  beta[j,1] ~ dnorm(0,0.01)
  beta[j,2] ~ dnorm(0,0.01)
}

# Gold standard item
beta[p,1] <- 100 # This fixes sens and spec to 1. Assign
beta[p,2] <- -100 # dnorm(0,0.01) prior if no gold std.

# Sensitivities and specificities
for (j in 1:p) {
  sens[j] <- phi(beta[j,1] / sqrt(1 + pow(sigma[1], 2)))
  spec[j] <- 1 - phi(beta[j,2] / sqrt(1 + pow(sigma[2], 2)))
}
}

#data# X, n, p
#monitor# tau, sens, spec, beta, deviance

```

## Finite Mixture Latent Class Model

```

model{
  for (i in 1:n) { # individuals
    for (j in 1:p) { # items
      Y[i,j] ~ dbern(A[i,j])
      A[i,j] <- pow(w[j, 1] * d[i] + (1 - w[j,2]) * (1 - d[i]), 1 - l[i])
        - l[i] * (1 - d[i])
    }
    l[i] ~ dbern(pi.l[i])
    pi.l[i] <- d[i] * eta[1] + (1 - d[i]) * eta[2]
    d[i] ~ dbern(tau)
  }

  # Priors
  tau ~ dbeta(1,1)
  eta[1] ~ dbeta(1,1)
  eta[2] ~ dbeta(1,1)
  for (k in 1:2) {
    for (j in 1:(p-1)) {
      w[j,k] ~ dbeta(1,1)
    }
  }

  # Gold standard item

```

```
w[p,k] <- 1 # if no gold std, assign dbeta(1,1) prior
}

# Sensitivities and specificities
for (j in 1:p) {
  sens[j] <- eta[1] + (1 - eta[1]) * w[j,1]
  spec[j] <- eta[2] + (1 - eta[2]) * w[j,2]
}

}

#data# I, J, K, Y
#monitor# tau, sens, spec, eta, deviance
```
